# Supplementary material for: DTX3L ubiquitin ligase ubiquitinates single-stranded nucleic acids
Source: eLife. 2024 Oct 8;13:RP98070. doi: 10.7554/eLife.98070 (PMC11460948; doi:10.7554/eLife.98070)
Supplement: Figure 1—figure supplement 1—source data 1. [file elife-98070-fig1-figsupp1-data1.xlsx]

## Sheet: Fig S1B
Conc (nM)	D1	D2	D3	D4	D5	D6	D7	D8	D9
0	1	1	1	1	1	1	1	1	1
2.44141	0.791045	1.17857	0.677966	1.15	1.36111	0.625	1.25	1.12121	1
4.88281	0.940299	1.28571	1.16949	1.35	1.30556	0.678571	1.80556	0.717172	1.02941
9.76562	1.20896	1.11905	1.18644	1.575	1.36111	1.25	1.5	1.15152	1.02941
19.5312	1.67164	1.73809	1.16949	1.3	1	1.28571	1.83333	0.969697	1.35294
39.0625	2.25373	2.28571	1.72881	2.125	1.58333	1.82143	3.58333	1.36364	1.29412
78.125	2.8806	2.36905	1.91525	2.525	2.16667	2.28571	3.97222	1.54546	1.85294
156.25	3.77612	3.23809	2.35593	4.25	2.75	4.16071	6.58333	2.43434	3.05882
312.5	4.44776	3.40476	3.89831	5.975	4.33333	4.80357	8.08333	2.87879	3.73529
625	5.10448	3.65476	4.67797	7.075	5.66667	5.35714	8.44444	3.22222	6.52941
1250	5.0597	4.04762	4.9322	7.675	6.41667	5.96429	8.61111	3.28283	8.52941
2500	5.19403	4.21429	5.38983	7.875	6.30556	6.03571	9.38889	3.50505	9.35294
