# Supplementary material for: DTX3L ubiquitin ligase ubiquitinates single-stranded nucleic acids
Source: eLife. 2024 Oct 8;13:RP98070. doi: 10.7554/eLife.98070 (PMC11460948; doi:10.7554/eLife.98070)
Supplement: Figure 1—figure supplement 1—source data 2. [file elife-98070-fig1-figsupp1-data2.xlsx]

## Sheet: FIG S1C
Conc (nM)	D1	D2	D3	D4	D5	D6	D7	D8	D9
0	1	1	1	1	1	1	1	1	1
4.88281	1.48421	0.979866	1.30693	1.12308	1.34146	1.04167	1.0411	1.36709	0.8125
9.76562	1.70526	0.85906	1.50495	1.21538	1.76829	1.22222	1.16438	1.48101	0.875
19.5312	1.82105	0.899329	1.93069	1.26154	2.59756	1.66667	1.39726	1.44304	1.09375
39.0625	2.52632	1.25503	2.70297	1.58462	3.34146	2.38889	1.90411	1.72152	0.90625
78.125	2.78947	1.42953	2.70297	2.66154	3.15854	2.98611	2.57534	2.16456	1.26562
156.25	3.02105	1.6443	2.80198	3.38462	3.4878	3.65278	3.16438	2.70886	1.21875
312.5	3.09474	1.88591	2.94059	3.87692	3.93902	4.09722	3.50685	3.13924	1.96875
625	3.43158	1.88591	3.05941	3.93846	3.92683	4.04167	3.84932	3.29114	3.1875
1250	3.58947	2.21477	3.28713	4.30769	4.0122	4.29167	4.15068	3.56962	3.73438
2500	3.67368	2.19463	3.46535	4.63077	4.31707	4.55556	4.34247	4.08861	4.82812
5000	3.8	2.32886	3.50495	4.8	4.2439	4.69444	4.47945	4.59494	5.01562
