# Supplementary material for: DTX3L ubiquitin ligase ubiquitinates single-stranded nucleic acids
Source: eLife. 2024 Oct 8;13:RP98070. doi: 10.7554/eLife.98070 (PMC11460948; doi:10.7554/eLife.98070)
Supplement: Figure 1—figure supplement 1—source data 3. [file elife-98070-fig1-figsupp1-data3.xlsx]

## Sheet: FIG S1D
Conc (nM)	D1	D2	D3	D4	D5	D6	D7	D8	D9
0	1	1	1	1	1	1	1	1	1
2.44141	0.755102	1.06173	1.43182	0.804878	0.666667	0.611111	0.788462	1.55172	1.68853
4.88281	0.632653	1.44444	1.20454	1.56098	1.13333	1	1.05769	1.15517	1.01639
9.76562	2.22449	1.4321	1.61364	1.29268	1.16667	1.37037	1.23077	1.03448	1.34426
19.5312	1.91837	1.69136	1.54546	0.756098	1.33333	0.907407	1.55769	2.48276	1.47541
39.0625	2.79592	1.83951	1.65909	1.97561	1.93333	1.14815	1.76923	2.60345	1.42623
78.125	3.46939	2.35803	2.20454	2.90244	2.13333	2.2037	2.76923	3.18966	2.01639
156.25	4.4898	3.28395	3.38636	4.02439	2.76667	3.77778	3.67308	4.05172	2.60656
312.5	6.12245	3.4321	4.88636	4.92683	3.86667	5.11111	4.57692	4.51724	3.52459
625	6.04082	3.77778	5.45455	6.53658	6.23333	5.83333	5.65385	4.93103	4.01639
1250	6.14286	4.04938	5.97727	7.17073	7	5.68518	5.96154	5.41379	4.86885
2500	6.55102	4.18518	6.29545	7.46342	6.6	6.03704	6.48077	5.56897	3.91803
