# Supplementary material for: DTX3L ubiquitin ligase ubiquitinates single-stranded nucleic acids
Source: eLife. 2024 Oct 8;13:RP98070. doi: 10.7554/eLife.98070 (PMC11460948; doi:10.7554/eLife.98070)
Supplement: Figure 1—figure supplement 1—source data 4. [file elife-98070-fig1-figsupp1-data4.xlsx]

## Sheet: FIG S1E
Conc (nM)	D1	D2	D3	D4	D5	D6	D7	D8	D9
0	1	1	1	1	1	1	1	1	1
4.88281	1.08621	1.14286	0.851485	1.37209	1.07619	1.35088	1.16456	0.977528	1.10714
9.76562	0.465517	1.18797	1.0099	1.39535	0.942857	1.17544	1.03797	1.14607	1.26786
19.5312	1.26724	1.25564	1.34653	1.30233	1.31429	1.64912	1.10127	1.06742	1.14286
39.0625	1.43103	1.42857	1.35644	1.62791	1.50476	1.57895	1.43038	1.39326	1.26786
78.125	1.92241	1.59398	2.24752	1.86047	2.09524	1.66667	1.56962	1.60674	1.30357
156.25	2.74138	1.95489	2.65347	2.34884	2.57143	2.24561	2.3038	1.94382	1.55357
312.5	2.56034	2.21805	2.90099	3.53488	2.92381	3.33333	2.92405	2.4382	1.64286
625	2.62931	2.33835	3.0495	3.97674	3.05714	3.80702	3.35443	2.61798	2.35714
1250	2.7931	2.45865	3.25743	3.97674	3.15238	3.89474	3.35443	3.37079	3.17857
2500	2.63793	2.48872	3.28713	3.81395	3.19048	3.75439	3.3038	3.05618	3.33929
5000	2.34483	2.45865	3.19802	3.76744	3.00952	3.70175	3.10127	3.1236	2.85714
