# Supplementary material for: DTX3L ubiquitin ligase ubiquitinates single-stranded nucleic acids
Source: eLife. 2024 Oct 8;13:RP98070. doi: 10.7554/eLife.98070 (PMC11460948; doi:10.7554/eLife.98070)
Supplement: Figure 1—source data 1. [file elife-98070-fig1-data1.xlsx]

## Sheet: Fig 1D
Conc (nM)	D1	D2	D3	D4	D5	D6	D7	D8	D9
0	1	1	1	1	1	1	1	1	1
2.44141	1.61818	0.672269	1.37778	1.09091	4.5	1.45652	1.18182	1.08824	0.974359
4.88281	1.8	0.563025	0.866667	0.818182	4.3	0.934783	0.727273	1	1.02564
9.76562	0.981818	0.865546	1.22222	1.09091	2.5	1.28261	1.22727	1.80882	1.1282
19.5312	1.50909	1.12605	1.22222	1.29546	4.6	0.891304	1.86364	1.52941	1.07692
39.0625	2.50909	1.04202	1.95556	1.81818	8.2	1.15217	1.70454	1.79412	1.10256
78.125	3.30909	1.70588	2.86667	2.31818	7	2.43478	3.15909	2.14706	2.17949
156.25	4.85454	2.02521	2.77778	3.18182	8.6	3.95652	4.22727	3.23529	2.4359
312.5	5.27273	2.42017	4.84444	4.93182	12.6	5.84783	5.36364	3.92647	3.61538
625	5.72727	2.63025	5.66667	5.18182	16	6.84783	6.5	4.17647	4.10256
1250	5.58182	2.63025	5.31111	6.20455	16.9	6.76087	6.68182	4.27941	3.30769
2500	5.47273	2.5042	5.11111	6.06818	14.7	6.45652	6.65909	4.61765	1.92308
