# Supplementary material for: DTX3L ubiquitin ligase ubiquitinates single-stranded nucleic acids
Source: eLife. 2024 Oct 8;13:RP98070. doi: 10.7554/eLife.98070 (PMC11460948; doi:10.7554/eLife.98070)
Supplement: Figure 1—source data 2. [file elife-98070-fig1-data2.xlsx]

## Sheet: FIG 1E
Conc (nM)	D1	D2	D3	D4	D5	D6	D7	D8	D9
0	1	1	1	1	1	1	1	1	1
4.88281	1.05505	0.948052	1.13333	1.16667	1.07368	1.22034	0.988372	0.948718	1.07018
9.76562	1.17431	1.17532	1.26667	1.22222	1.13684	1.30508	0.802326	0.982906	1.03509
19.5312	1.26606	1.07143	1.3619	1.42593	1.44211	1.42373	1.11628	0.965812	1.05263
39.0625	1.56881	1.45455	1.85714	1.77778	1.72632	1.66102	1.25581	1.35897	1.38596
78.125	2.22018	1.66883	2.15238	3	2.41053	2.45763	1.60465	1.48718	1.49123
156.25	2.51376	1.8961	2.67619	3.25926	2.73684	3.62712	2.06977	2.13675	2.52632
312.5	2.81651	2.01948	3	3.68519	3.18947	4.9322	2.9186	2.48718	3.64912
625	3.16514	2.11039	3.14286	4.87037	3.44211	5.18644	3.30233	2.58974	5
1250	3.22936	2.16883	3.40952	5.77778	3.38947	5.47458	3.73256	2.80342	5.52632
2500	3.24771	2.04545	3.42857	5.72222	3.61053	5.37288	3.56977	2.71795	5.52632
5000	3.12844	2.05195	3.25714	5.11111	3.54737	5.11864	3.61628	2.75214	4.96491
