# Supplementary material for: DTX3L ubiquitin ligase ubiquitinates single-stranded nucleic acids
Source: eLife. 2024 Oct 8;13:RP98070. doi: 10.7554/eLife.98070 (PMC11460948; doi:10.7554/eLife.98070)
Supplement: Figure 4—source data 3. [file elife-98070-fig4-data3.xlsx]

## Sheet: Fig 4F
Initial Substrate (uM)	F-NAD+		D4
0.75	-0.00139	4.14e-05	0.001766	0.003835
1.5	-0.00073	0.001277	0.004735	0.008809
3.25	0.000948	0.00206	0.007579	0.015128
7.5	0.006635	0.009064	0.015975	0.021542
15	0.018104	0.018578	0.030904	0.022548
37.5	0.039587	0.045585	0.029564	0.029368
